# Supplementary material for: Technical note: Evaporating water is different from bulk soil water in δ 2 H and δ 18 O
Source: Copernicus journal article supplement (doi:10.5194/hess-2020-648), 2021-01-26
Supplement: Supplementary file 1 [file Data sets.xlsx]

## Sheet: 0-5cmBulkSoilWater
date	VWC(cm3cm-3)	SE	d2H(‰)	SE	d18O(‰)	SE
20160717	0.139116	0.02051	-36.0862	1.75501	-1.14676	0.653235
20160721	0.187702	0.00953085	-48.0225	3.16206	-4.06856	0.793587
20160724	0.120663	0.0103903	-37.7892	2.81459	-1.22057	0.905509
20160727	0.29739	0.00664118	-53.1665	1.7637	-5.16465	0.490168
20160803	0.144915	0.0107932	-47.3448	2.00799	-3.2603	0.700222
20160806	0.0916635	0.0027182	-39.8909	3.23975	-1.21434	0.88187
20160810	0.0927128	0.00372308	-43.1486	2.24735	-0.763444	0.444459
20160813	0.074615	0.00317802	-34.0029	3.31444	1.47749	0.523554
20160817	0.0713183	0.0244556	-40.1743	2.92568	-1.01117	0.157126
20160820	0.0542232	0.00769362	-38.0013	0.39021	1.31251	0.171395
20160823	0.0428266	0.00499943	-39.2128	2.81223	-0.222392	0.591755
20160829	0.239974	0.028181	15.9919	3.69675	-3.07489	0.401816
20160901	0.144336	0.0265819	15.0491	3.39505	-0.305041	0.686899
20160905	0.0969356	0.00252312	13.345	3.60119	2.38918	1.02324
20160909	0.123602	0.00856436	1.57974	5.52279	0.696169	0.692642
20160913	0.0995148	0.0115376	2.35902	2.89137	0.941062	0.57107
20160916	0.0898637	0.00465734	-11.6133	2.33442	0.633428	0.468885
20160921	0.354455	0.00495994	-45.0016	1.64842	-6.28628	0.348295
20160925	0.314599	0.00566957	-37.867	1.25979	-4.46613	0.164332
20161001	0.256483	0.00236518	-24.8719	2.32678	-2.99455	0.43661

## Sheet: EvaporatingWater
date	d2H(‰)	SE	d18O(‰)	SE
20160722	-53.7618	0.844102	-6.11316	0.252524
20160723	-54.5884	1.90126	-5.34334	0.613573
20160724	-54.4092	1.17285	-5.39576	0.666332
20160731	-51.9291	0.431956	-4.06111	0.0544996
20160801	-59.9013	5.15494	-5.98456	0.414408
20160802	-61.8546	1.84494	-6.10814	0.171347
20160806	-50.8881	1.29804	-3.95705	0.265762
20160831	13.1559	3.5075	-3.8881	0.595868
20160903	16.1001	6.34014	-3.28273	0.590056
20160905	15.3261	1.03312	-1.53203	0.790848
20160907	9.29144	1.62637	-0.464666	0.417291
20160910	2.64797	1.79928	-0.725718	0.628628
20160913	5.50572	2.38892	-1.77376	0.207564
20160915	-8.17446	4.29715	-0.671376	0.417264
20160917	-7.97311	3.27504	-0.798348	0.492433
20160925	-50.2698	0.553192	-7.70596	0.177693

## Sheet: EvaporativeWaterLoss
date	2H(Bulk soil water)	SE	18O(Bulk soil water)	SE	2H(Evaporating water)	SE	18O(Evaporating water)	SE
20160727	0.149694	0.019463	0.120675	0.013088	N.A.	N.A.	N.A.	N.A.
20160803	0.212136	0.0221158	0.171909	0.0189701	N.A.	N.A.	N.A.	N.A.
20160806	0.293689	0.0360979	0.228614	0.0244395	N.A.	N.A.	N.A.	N.A.
20160810	0.255822	0.0253245	0.243103	0.0127225	N.A.	N.A.	N.A.	N.A.
20160813	0.360387	0.0379752	0.306919	0.0152421	N.A.	N.A.	N.A.	N.A.
20160817	0.290623	0.0326061	0.233873	0.00435388	N.A.	N.A.	N.A.	N.A.
20160820	0.315102	0.00430762	0.296996	0.00474476	N.A.	N.A.	N.A.	N.A.
20160823	0.301938	0.030925	0.254295	0.0161513	N.A.	N.A.	N.A.	N.A.
20160829	N.A.	N.A.	0.172853	0.0110436	N.A.	N.A.	0.153442	0.00977721
20160901	N.A.	N.A.	0.250604	0.0195084	N.A.	N.A.	0.221512	0.0171456
20160905	N.A.	N.A.	0.330428	0.0305748	N.A.	N.A.	0.290396	0.0265689
20160909	N.A.	N.A.	0.28276	0.0205254	N.A.	N.A.	0.24751	0.0177877
20160913	N.A.	N.A.	0.294618	0.0177162	N.A.	N.A.	0.255111	0.0151055
20160916	N.A.	N.A.	0.292735	0.0156191	N.A.	N.A.	0.248988	0.012945

## Sheet: PrecipitationIrrigation
date	d2H	SE	d18O	SE
20160711	-55.5931	0.220989	-8.1288	0.0683549
20160713	-53.5688	0.222566	-7.8925	0.0713621
20160718	-58.7793	0.20522	-7.51441	0.0382829
20160721	-35.3411	0.239357	-5.69804	0.176618
20160724	-62.9725	0.19944	-8.11212	0.0529008
20160725	-49.7124	0.220666	-6.67704	0.0906373
20160730	-77.7719	0.510894	-8.29375	0.0537945
20160801	-74.7338	0	-9.55406	0
20160912	-13.4659	0.405467	-0.907413	0.11977
20160914	-10.8729	0.0671039	-1.42751	0.0761314
20160920	-34.6275	0.255474	-6.01595	0.0905572
20160924	-43.2148	0.20115	-4.71083	0.0268201
20160928	-49.25	0.126105	-6.96628	0.0263915
20160826	51.1208	2.71025	-9.4003	0.0545154

## Sheet: 0-60cmSoilWater
date	depth	VWC(cm3cm-3)	SE	d2H(‰)	SE	d18O(‰)	SE	lc-excess	SE
20160717	2.5	0.118766	0.02051	-36.0862	1.43592	-1.14676	0.653235	-37.5501	3.38395
	7.5	0.263114	0.00323923	-38.7874	6.65424	-4.02518	0.704783	-17.7707	2.76683
	15	0.264419	0.00329253	-21.684	5.22087	-1.68735	0.262736	-18.9258	2.37596
	25	0.264085	0.00328089	-28.7627	6.68659	-3.26985	0.458123	-13.6452	1.88881
	35	0.250367	0.0128307	-42.5155	4.78407	-5.42455	0.203321	-10.5697	0.33293
	50	0.235061	0.00275882	-52.0514	4.53979	-6.81559	0.292454	-9.24166	0.310587
20160803	2.5	0.151554	0.0107932	-47.3448	2.23743	-3.2603	0.700222	-32.3019	3.50594
	7.5	0.236168	0.0140488	-48.1009	5.59072	-5.35535	0.731696	-16.6957	0.957833
	15	0.218042	0.00397567	-37.879	5.79879	-4.68461	1.00817	-11.7122	2.14817
	25	0.252061	0.00706224	-37.4969	5.81241	-4.58464	0.764213	-12.1109	0.610598
	35	0.264133	0.0090309	-44.1138	1.63746	-5.77006	0.388039	-9.46968	1.64864
	50	0.280588	0.0205389	-49.2572	0.392421	-6.49429	0.184876	-8.95683	1.11673
20160817	2.5	0.0814883	0.0244556	-40.1743	2.09467	-1.01117	0.157126	-42.6971	3.76939
	7.5	0.15074	0.00666302	-37.0464	0.8958	-2.53907	0.331358	-27.6363	2.70889
	15	0.173914	0.00526149	-35.5806	1.96486	-3.64131	0.494296	-17.562	2.5629
	25	0.184378	0.00927388	-36.5854	2.98465	-4.1944	0.412279	-14.2472	2.76184
	35	0.18126	0.00849084	-43.0359	5.69466	-5.34061	0.297528	-11.7457	1.55834
	50	0.18257	0.00735687	-52.2038	4.48607	-6.27118	0.768971	-13.6459	3.36529
20160901	2.5	0.139051	0.0265819	7.68829	2.89639	-1.22281	0.987686	N.A.	N.A.
	7.5	0.216602	0.0180224	-7.17791	4.19229	-4.47143	1.00884	N.A.	N.A.
	15	0.212039	0.0203999	-29.4027	1.96943	-4.5445	0.53656	N.A.	N.A.
	25	0.209038	0.00667807	-34.1477	0.933372	-4.47585	0.222176	N.A.	N.A.
	35	0.182642	0.00423101	-38.3762	2.18843	-4.78642	0.244432	N.A.	N.A.
	50	0.16752	0.00498618	-47.9275	1.52044	-6.17242	0.269636	N.A.	N.A.
20160916	2.5	0.0939646	0.00465734	-11.6133	3.00713	0.633428	0.468885	N.A.	N.A.
	7.5	0.163907	0.00425393	-9.51325	3.81761	-2.24611	0.128431	N.A.	N.A.
	15	0.193068	0.00376446	-21.8874	3.88814	-4.45812	0.373525	N.A.	N.A.
	25	0.209941	0.0091202	-28.8916	3.44098	-4.5982	0.459959	N.A.	N.A.
	35	0.194622	0.000651897	-35.3168	3.39025	-4.77062	0.40463	N.A.	N.A.
	50	0.179626	0.00165775	-45.8582	4.04689	-6.04853	0.264081	N.A.	N.A.
