# Supplementary material for: Technical note: Evaporating water is different from bulk soil water in δ 2 H and δ 18 O
Source: Copernicus journal article supplement (doi:10.5194/hess-2020-648), 2021-01-26
Supplement: Supplementary file 1 [file Supplement File.pdf › Supplement materials/Supplement File.pdf]

Using soil temperature under film to extend vapor temperature under film (the film was used to collect condensation water).

| Time: | Equation,           | R <sup>2</sup> |
|-------|---------------------|----------------|
| 0:    | $y=0.8494x+1.8987,$ | $R^2=0.8575$   |
| 1:    | $y=0.8204x+2.4469,$ | $R^2=0.8463$   |
| 2:    | $y=0.8524x+1.7783,$ | $R^2=0.8403$   |
| 3:    | $y=0.8605x+1.5379,$ | $R^2=0.7901$   |
| 4:    | $y=0.8688x+1.3451,$ | $R^2=0.782$    |
| 5:    | $y=0.9191x+0.3147,$ | $R^2=0.7985$   |
| 6:    | $y=0.974x-0.8207,$  | $R^2=0.8313$   |
| 7:    | $y=1.0053x-1.3928,$ | $R^2=0.8706$   |
| 8:    | $y=0.933x+0.6712,$  | $R^2=0.9652$   |
| 9:    | $y=1.4411x-8.6729,$ | $R^2=0.7947$   |
| 10:   | $y=1.4874x-9.1498,$ | $R^2=0.7977$   |
| 11:   | $y=1.5967x-11.793,$ | $R^2=0.8637$   |
| 12:   | $y=1.6719x-13.907,$ | $R^2=0.9031$   |
| 13:   | $y=2.0394x-23.049,$ | $R^2=0.9394$   |
| 14:   | $y=1.5758x-12.589,$ | $R^2=0.9461$   |
| 15:   | $y=1.5207x-11.826,$ | $R^2=0.9753$   |
| 16:   | $y=1.4404x-10.435,$ | $R^2=0.9596$   |
| 17:   | $y=1.1236x-3.0301,$ | $R^2=0.9729$   |
| 18:   | $y=1.0156x-0.9685,$ | $R^2=0.9832$   |
| 19:   | $y=0.8693x+1.7248,$ | $R^2=0.9747$   |
| 20:   | $y=0.7982x+3.0013,$ | $R^2=0.944$    |
| 21:   | $y=0.7782x+3.3322,$ | $R^2=0.9096$   |
| 22:   | $y=0.8194x+2.3823,$ | $R^2=0.899$    |
| 23:   | $y=0.8359x+2.1177,$ | $R^2=0.878$    |

Using soil temperature to extend soil temperature under film (the film was used to collect condensation water).

| Time: | Equation,           | R <sup>2</sup> |
|-------|---------------------|----------------|
| 0:    | $y=1.203x-3.8682,$  | $R^2=0.9288$   |
| 1:    | $y=1.1832x-3.3898,$ | $R^2=0.9359$   |
| 2:    | $y=1.1718x-3.0828,$ | $R^2=0.9379$   |
| 3:    | $y=1.1523x-2.7254,$ | $R^2=0.9471$   |
| 4:    | $y=1.2225x-4.2052,$ | $R^2=0.9537$   |
| 5:    | $y=1.163x-3.073,$   | $R^2=0.9584$   |
| 6:    | $y=1.1864x-3.5379,$ | $R^2=0.9311$   |
| 7:    | $y=1.177x-3.2208,$  | $R^2=0.9738$   |
| 8:    | $y=1.2421x-4.552,$  | $R^2=0.9724$   |
| 9:    | $y=1.1858x-3.3079,$ | $R^2=0.9286$   |
| 10:   | $y=1.3304x-5.8635,$ | $R^2=0.9197$   |
| 11:   | $y=1.3767x-6.9034,$ | $R^2=0.9394$   |
| 12:   | $y=1.5941x-11.359,$ | $R^2=0.971$    |
| 13:   | $y=1.5959x-11.855,$ | $R^2=0.937$    |
| 14:   | $y=1.7654x-15.497,$ | $R^2=0.9442$   |
| 15:   | $y=1.8087x-16.585,$ | $R^2=0.9523$   |
| 16:   | $y=1.9561x-19.872,$ | $R^2=0.9438$   |
| 17:   | $y=1.8033x-16.564,$ | $R^2=0.931$    |
| 18:   | $y=1.6008x-11.862,$ | $R^2=0.9528$   |
| 19:   | $y=1.4936x-9.7408,$ | $R^2=0.9105$   |
| 20:   | $y=1.3393x-6.4503,$ | $R^2=0.9139$   |
| 21:   | $y=1.2999x-5.7053,$ | $R^2=0.9235$   |
| 22:   | $y=1.2581x-4.7849,$ | $R^2=0.9281$   |
| 23:   | $y=1.2191x-4.0774,$ | $R^2=0.9268$   |
